# Supplementary material for: Impact of nonalcoholic fatty liver disease on the functional cure of nucleos(t)ide analogues-treated chronic hepatitis B patients add-on pegylated interferon therapy: a retrospective study
Source: PeerJ journal article supplement (doi:10.7717/peerj.19972), 2025-09-24
Supplement: raw_data.xlsx [file raw_data.xlsx]

## Sheet: Baseline
group	sex	age(years)	family history	NAs-treated time(years)	HBsAg(IU/mL)	HBeAg(C.O.I)	ALT,U/L	AST,U/L	GGT,U/L	ALP,U/L	TP,g/L	ALB,g/L	TBIL,µmol/L	DBIL,µmol/L	AFP,ng/mL	UREA,mmol/L	CREA,µmol/L	UA,µmol/L	GLU,mmol/L	WBC,×109/L	NLR	PLT,×109/L
MAFLD	male	41	No	10	2010.24	0.05	39	32	32	74	81.2	49	11.1	3.5	1.79	5.1	70.1	346	5.7	12.1	3.48	235
MAFLD	male	54	No	6	158.81	0.29	42	25	30	65	81.2	50.9	19.3	6.4	2.84	6.8	84	435	5.6	5.2	1.99	211
MAFLD	male	32	No	6	379.28	0	22	15	20	72	71.5	50.5	27.1	8.3	3.4	3.2	64	420	5.17	5.3	1.05	317
MAFLD	male	45	No	5	293.85	1.89	68	51	71	55	81.7	51.9	13	4.7	2.41	4.3	86	289	6.42	7.9	1.93	215
MAFLD	male	39	No	3	882.13	1.98	24	20	34	60	79.2	52.4	11.7	3.6	3.15	6.8	70	329	4.9	7	1.43	150
MAFLD	male	45	No	9	272.21	0	19	15	42	81	63.7	41.1	9.4	3.3	2.48	6.1	57	313	5.87	4.8	2.22	278
MAFLD	male	38	No	3	13.34	0	15	16	22	87	82.7	54.8	26.5	8.3	2.8	5.2	68	413	5.46	10.2	3.88	280
MAFLD	male	38	No	2	91.73	0	28	22	16	60	73.3	49.3	24.4	7.6	2.3	3.75	73	319	5.1	5.3	1.84	203
MAFLD	male	37	No	1	119.17	0	29	21	13	57	80.8	51.3	14.1	4	1.12	5.07	72	449	5.3	7.3	2.17	309
MAFLD	male	42	No	11	699.52	0.03	40	25	24	92	76.7	48.4	13.1	4.2	3.14	4.7	72	268	6.3	7	2.39	230
MAFLD	male	38	No	1	1192.53	0.05	65	40	29	85	80	47.6	16.9	5.5	3.38	4.6	56	348	5.44	3.2	0.48	148
MAFLD	male	34	Yes	6	568.84	15.05	37	22	22	80	78.4	46.9	11.5	3.6	5.27	4.9	74	488	6.78	6.8	2.66	216
MAFLD	male	43	Yes	4	0.1	0.02	25	20	19	86	77.1	48.1	12.6	4.6	1.73	3.1	83	367	5.8	6.1	1.62	224
MAFLD	male	27	No	2	1467.82	0.02	9	14	17	93	80.6	51.7	17.5	6.1	2.35	6.9	72	301	5.29	7.3	4.8	216
MAFLD	male	24	No	2	1332.34	0.03	18	13	25	82	77.4	49.5	13.9	5.1	4.72	3.3	79	343	4.88	6.3	1.73	225
MAFLD	male	29	No	4	337.99	11.27	35	23	29	70	74.6	48.3	18	5.2	2.32	4.19	85	313	5.32	5.6	0.92	234
MAFLD	male	45	No	8	1043.45	0.02	13	14	19	106	78.9	53.5	9.8	3.2	1.91	5.52	71	356	5.3	7	1.89	210
MAFLD	female	44	Yes	5	696.21	8.53	12	11	19	52	81.7	46.1	3.7	1.8	2.06	4.82	42	244	6	5	1.94	324
MAFLD	male	25	No	3	355.93	30.79	21	22	31	109	76.9	51.5	13	4.8	2.67	3.64	92	426	5.7	5.9	2.47	263
MAFLD	male	48	No	8	1071.58	0.02	25	17	32	45	76.8	48	10.9	4.5	5.17	4.62	69	391	5.62	2.5	0.57	173
MAFLD	male	46	No	9	20.49	0.07	15	14	32	95	75.7	46.9	15.1	6	2.26	6.52	85	312	5.41	6.6	1.17	239
MAFLD	male	37	No	1	24.23	0.02	24	20	18	76	77.6	47.3	8.9	3.4	2.05	4.8	76	412	5.83	5.5	2.02	275
MAFLD	male	29	No	6	196.97	0.07	10	18	16	74	77.5	49.9	18	5.1	3.91	5.8	65	286	4.56	5.5	0.78	212
MAFLD	male	58	No	10	1294.07	47.58	17	20	30	85	72.5	48.7	13.5	5.3	2.75	6.13	77	314	5.78	6.4	1.58	148
MAFLD	male	35	No	2	1371.7	0.96	29	18	18	80	72.7	45.5	27.3	9.5	2.61	3.26	88	282	6.51	7.9	2.93	194
MAFLD	male	27	No	4	605.93	0.4	12	19	17	69	69.5	49.8	37.3	10.6	4.03	4.5	58	345	5.7	4.6	1.8	222
MAFLD	male	42	Yes	13	1030.23	0.05	24	19	38	60	73.8	46.3	11.9	4.3	2.3	6.01	63	332	5.36	9.8	2.02	196
MAFLD	female	36	No	2	5646.27	7.88	106	56	40	82	80.4	45.7	15.5	4.7	2.34	5.7	75	401	5.7	4.24	2	163
MAFLD	male	28	No	4	71.98	0.38	80	38	43	72	76	48	43.2	8.8	2.32	3.84	95	289	4.8	4.78	0.94	229
MAFLD	male	29	Yes	4	398.62	1066.93	21	19	15	61	75	51.9	12.5	4.5	4.27	5.28	69	264	6.23	6.6	1.55	227
MAFLD	male	31	Yes	2	792.79	0	122	53	95	154	73.4	47	8.4	3.6	3.2	5.26	70	347	4.78	4.3	1.78	146
MAFLD	male	42	No	11	208.89	0.01	64	63	71	65	68.4	42.9	13.4	5.3	2.58	5.7	74	339	4.53	4.2	1	162
MAFLD	male	55	Yes	6	0.16	0	40	27	82	81	83.5	49.6	7.5	3	5.46	5.1	73	318	6.09	5.6	1.44	205
MAFLD	male	43	Yes	4	302.86	2.08	30	23	40	74	82.4	51.2	15.5	6	2.05	6.2	56	367	5.68	9.3	5.93	242
MAFLD	male	42	Yes	2	480.63	0.02	32	17	54	47	70.6	46.6	9.5	4	4.24	4.88	73	382	6.13	6.1	0.92	258
MAFLD	male	40	No	11	338.17	156.93	24	19	102	71	86.7	54.7	8.7	3.7	4.35	5.55	62	422	6.33	9	1.16	223
MAFLD	male	33	No	3	392.38	0.05	41	22	35	97	78.8	49.6	9.4	3.1	2.72	4.65	73	431	4.89	8	2.52	322
MAFLD	male	48	No	6	70	0.01	19	26	27	50	76.9	51.3	10.6	3.5	1.33	6.35	66	344	5.34	7.1	1.28	165
MAFLD	male	36	No	5	687.61	68.34	59	30	41	81	74.1	49.8	9.6	3.8	2.41	3.4	78	245	5.71	8.2	1.41	271
MAFLD	male	49	No	2	0.33	1.23	38	43	47	78	74.2	48.9	7.9	3.1	3.11	6.36	89	457	5.93	6.5	1.25	235
MAFLD	male	37	No	10	50.36	8.89	42	24	83	80	77.5	53.5	11.9	4.2	3.25	5.9	60	303	6.5	7.7	2.58	199
MAFLD	male	45	No	8	499.77	11.09	17	19	20	129	83.5	53.9	10.6	3.4	2.8	6.02	97	372	4.78	6.6	1.5	124
MAFLD	male	37	No	2	937.87	0.29	29	26	53	55	79.9	52.4	21.7	6	3.19	5.36	78	407	6.25	5.3	1.23	199
MAFLD	male	32	No	1	1101.55	14.08	24	21	34	81	79.8	45.2	13.9	4.7	3.6	4.45	57	390	4.88	7.1	1.66	179
MAFLD	male	46	No	10	151.1	0.01	22	15	38	61	76.9	50.6	9.3	3.5	2.74	6.08	79	490	7.05	5.8	1.82	206
MAFLD	male	42	No	11	360.27	29.78	119	46	126	91	71.4	48.3	15.3	6	1.86	5.76	98	349	4.56	6.8	1.61	246
MAFLD	male	39	No	5	195.72	0.4	52	34	40	72	74	48.8	9.6	4.6	2.9	6.4	86	334	5.86	5.7	1.44	225
MAFLD	male	37	No	2	1167.63	47.61	30	21	55	89	75.2	45.1	14.2	4.8	3.57	6.29	76	477	6.34	9.9	0.83	269
MAFLD	male	38	Yes	7	4706	0.39	32	22	83	69	71.5	45	10.4	4.6	4.3	4	69	365	4.9	6.5	1.49	285
MAFLD	male	40	No	1	4630	0.26	17	18	37	58	72.3	50.2	17.8	5.9	16.3	4.4	80	346	5.76	5.9	3.98	201
MAFLD	female	55	No	2	9389.32	1069.43	21	19	12	89	76.3	48.5	6.2	3.3	5.8	6.76	61	228	5.32	6.6	1.23	332
MAFLD	male	41	No	4	48.06	1.28	32	26	20	73	75.6	48.1	9.4	3.2	2.55	5.8	70	330	4.33	4.6	0.47	167
MAFLD	male	49	No	2	261.46	0.26	40	27	35	54	77	48.6	12.3	4.8	2.8	5.01	57	335	6.01	4.6	1.53	217
MAFLD	male	41	Yes	5	2693.92	74.9	12	16	12	52	74.4	47.6	34.8	9.3	3.34	5	59	367	4.44	7.2	2.1	289
MAFLD	male	38	No	10	1658.87	0.47	19	18	14	70	73.5	50.5	15.5	5.6	3.62	5.1	79	342	5.86	5.6	1.07	235
MAFLD	female	36	Yes	3	3914	5.66	26	30	19	129	82.2	50.7	10.6	3.7	3.03	2.8	46	212	4.03	6.9	2.46	218
MAFLD	male	40	Yes	3	7622.03	3559.87	50	24	47	52	69.2	44.1	13	4.8	5.14	5.48	68	352	6.12	4.4	1.65	188
MAFLD	male	46	No	10	645.41	72.79	35	24	18	77	74	46.6	12.7	4.9	2.51	5.2	66	244	7.82	7.3	2.14	174
MAFLD	female	38	No	5	3568.83	1189.68	15	16	10	62	70.4	43.7	5.1	2.2	1.55	6.24	52	217	4.35	5.5	1.33	249
MAFLD	male	37	No	4	889.73	0.04	48	29	33	74	79	49.5	11.6	3.7	2.7	5.75	68	466	5.13	5.6	2.33	290
MAFLD	male	45	No	8	347.79	0.3	35	24	23	47	73.1	51.4	12.1	4.7	1.4	4.39	64	490	5.92	6.1	1.77	220
MAFLD	male	38	No	6	9654	0.45	38	22	30	60	80.3	50	18	5.6	2.18	5.4	70	421	6.05	6.8	2.76	283
MAFLD	female	41	Yes	5	764.39	7.51	20	21	22	64	75.1	46.9	9.2	3.7	3.29	3.34	41	274	5.21	8.4	3.21	241
MAFLD	male	20	Yes	3	937.32	15.1	18	15	32	68	81	46.7	9.6	4.2	3.2	4.9	53	267	5.7	3.3	0.62	163
MAFLD	female	31	No	6	473.76	0.09	5	11	10	51	76	50.3	8.3	2.8	2.21	4.5	41	181	5.89	5.5	1.59	247
MAFLD	male	41	No	5	2405	0.16	46	30	38	74	74.1	49.8	13.4	4.1	1.56	5.2	60	337	5.99	6.9	1.08	261
MAFLD	male	33	No	3	1445.22	160.04	12	15	14	94	74.4	48.8	7.4	2.9	2.13	4.2	71	288	6	6.4	2.07	320
No MAFLD	male	31	No	1	917	0.02	31	24	24	69	76	48	14.5	4.3	9.33	5.6	71	375	4.52	4.1	1.71	137
No MAFLD	male	34	No	8	12.59	0.02	12	16	17	74	76.1	53.5	20.3	7	3.82	3.9	63	401	5.13	4.8	1.74	200
No MAFLD	male	39	No	1	1203	15.22	39	20	16	87	78.5	50.5	14.1	4.4	2.88	4.5	67	318	5.3	6.8	2.12	131
No MAFLD	male	46	No	5	5416.12	70.76	28	22	30	61	80.6	53.4	18	6.1	4.85	4.81	76	357	5.46	6.6	2.78	244
No MAFLD	male	41	No	1	610.12	0.02	20	23	13	70	76.2	49.6	7.1	3.3	2.38	5	62	269	5.1	3	1.33	164
No MAFLD	male	33	No	1	1425.37	0.02	15	22	15	77	77.7	49.6	43	8.2	3.6	5.1	72	309	4.6	5.8	2.55	242
No MAFLD	male	52	No	1	905.01	4.77	16	15	18	56	73.6	48.7	7.9	3.1	4.37	7.12	83	362	5.9	6.1	1.45	175
No MAFLD	male	42	Yes	12	302.5	0.09	153	84	53	70	71.9	47.4	16.9	6.4	4.48	3.8	51	413	6.01	5.7	0.85	159
No MAFLD	male	49	Yes	10	3285	57.91	22	16	20	85	76.4	44.9	8	3.6	2.08	6.4	79	261	5.86	9.2	2.09	277
No MAFLD	male	36	No	3	810.86	25.43	13	16	15	46	77.2	47.7	28.1	9	3.5	3.99	85	272	5.48	4.3	1.79	181
No MAFLD	male	52	No	1	1.22	0.03	27	24	22	74	76	50	14	4.8	5.6	4	56	348	5.9	5.2	0.68	164
No MAFLD	female	40	Yes	1	928.18	3.7	28	28	13	70	70	47.2	6.7	2.9	4.03	4.6	68	320	4.8	5.1	2.07	184
No MAFLD	male	34	No	3	647.8	0.08	22	22	22	61	77.2	50.9	16.8	6.8	2.1	3.1	65	272	5.1	3.9	1.87	131
No MAFLD	male	45	No	5	64.62	0.5	19	18	31	66	85.7	49.4	13.5	4.9	3.08	3.86	78	413	5.9	6.1	1.54	201
No MAFLD	female	46	No	2	1006.45	0.01	11	16	10	60	76.3	50.5	16.5	5.8	1.63	5.6	64	356	6.33	4.4	2.51	133
No MAFLD	male	40	No	4	111.76	0	16	14	17	54	79.8	47.7	12.3	4.5	3.5	3.6	81	298	5.7	3.9	0.38	125
No MAFLD	male	32	No	4	563.69	0.89	9	12	11	66	81.2	48.2	8.4	3.1	2.52	4.3	46	287	5.15	7.5	1.04	314
No MAFLD	female	39	No	2	1725.04	4.49	14	25	11	63	76.1	45.2	7.8	3.1	25.52	3.8	56	329	6.7	4.7	2.32	232
No MAFLD	male	41	No	10	96.32	0.01	18	15	25	72	77.8	46.6	19.1	6	3.94	4.8	78	332	5.8	7.5	2.45	239
No MAFLD	male	51	Yes	2	1245.48	7.71	29	24	25	75	70.2	48.6	8.2	3.9	3.49	6.1	61	318	4.9	5.1	1.36	148
No MAFLD	male	34	No	5	12.7	0.08	15	17	17	71	75.9	50.6	19.9	6.7	2.65	4.6	74	296	5.9	4.4	2.33	228
No MAFLD	male	39	No	4	8	0.82	22	21	46	45	74.3	51.5	11.8	4	2.7	4.5	67	305	4.5	5.8	1.68	146
No MAFLD	female	45	No	6	1223.24	0.01	32	47	12	63	80.7	47.8	6.8	2.6	1.59	4.07	48	163	6.04	3.6	1.22	164
No MAFLD	male	37	No	3	1.55	7.7	15	15	20	56	72.8	47.5	5.2	1.5	5.3	4.14	69	312	6.2	9	2.02	324
No MAFLD	male	44	No	8	770.86	29.76	26	28	17	71	68.8	46.1	12.1	4.2	2.41	3.86	64	358	5.78	4.2	1.99	193
No MAFLD	male	40	No	3	1311.44	0.01	26	24	32	92	81.6	48.2	15.5	4.8	2	6.25	89	286	5.9	3.3	1.7	113
No MAFLD	male	50	No	7	1462.13	121.94	10	17	9	50	74.7	45.4	15	5.2	2.17	4.13	56	286	6	8.9	2.48	250
No MAFLD	male	37	No	3	3280	0.86	36	32	17	48	70.7	44.6	5	2.8	5.6	5.16	81	246	5.32	4.5	2.27	205
No MAFLD	male	37	No	1	5798.67	3505.32	75	72	22	84	70.5	52.7	12.8	5.5	6.07	5.6	73	408	5.76	5.3	1.81	236
No MAFLD	female	48	No	10	1269.83	0.72	21	22	8	79	73.2	48.2	14	4.3	2.64	3.8	53	325	4.83	7.9	1.98	217
No MAFLD	male	40	No	7	6369.49	12.25	13	11	22	63	67.6	48.7	8.9	3.5	5.73	3.92	75	341	5.96	5.3	2.09	247
No MAFLD	male	42	No	1	577.4	0.96	22	18	61	160	77.2	51.2	12.1	4.5	3.33	3.1	71	445	6.5	5.6	1.24	151
No MAFLD	male	44	No	5	165.19	0.03	18	16	20	63	80.6	49.2	10.2	3.4	2.11	6.5	67	316	5.79	5.8	1.72	227
No MAFLD	male	37	No	2	375.01	0.02	15	16	10	60	70.9	44.8	15	6.5	3.8	2.39	52	268	5.8	4.2	1.39	167
No MAFLD	male	42	No	1	44.87	0.26	16	22	26	54	81.9	48.8	8.2	3	2.44	4.7	62	345	5.94	6.1	2.18	197
No MAFLD	male	42	Yes	11	302.5	0.1	153	84	53	70	75.7	50	15.7	5.9	4.48	3.8	51	413	5.68	5.7	0.85	159
No MAFLD	male	36	No	4	434.99	3.48	17	11	37	80	81.9	51.6	19.4	6.2	7.86	5.2	71	356	5.42	4.8	1.93	197
No MAFLD	male	43	Yes	5	646.72	10.71	19	20	12	70	78	50.1	15.6	4.3	2.3	4.3	75	267	6.34	6	2.38	278
No MAFLD	female	39	No	2	1725.04	4.49	14	25	11	63	76.1	45.2	7.8	3.1	25.52	3.9	76	324	6.04	4.7	2.32	232
No MAFLD	male	40	No	1	929.64	0.53	29	21	23	114	78.7	47.4	16.3	6.5	5.17	6.1	46	312	5.67	4.2	1.81	135
No MAFLD	male	35	No	8	1115.74	0	120	53	26	68	74.8	48.4	22.9	7.6	2.17	3.8	69	341	5.06	4.8	1.48	222
No MAFLD	male	29	No	3	157.65	0.06	40	23	28	95	80	54.7	23.4	7.2	8.6	4.5	65	456	5.78	4.8	1.56	229
No MAFLD	male	30	No	5	271.17	0.32	24	15	25	83	76.8	53.5	12.2	4.6	1.99	4.83	74	435	5.52	6.2	1.48	228
No MAFLD	female	38	Yes	2	53.07	0.01	16	18	14	62	75.7	49.9	20.4	7.1	2.36	3.8	68	246	6.14	5.9	2.22	134
No MAFLD	male	54	No	19	0.17	0.01	20	18	11	75	78.3	50.2	22.1	6.8	1.8	4.3	67	331	5.02	5.9	1.59	125
No MAFLD	male	30	No	4	1.26	0.03	25	15	36	77	79.2	48.7	9.1	3.8	1.92	5.7	75	356	4.86	9.6	2.42	242
No MAFLD	male	23	No	5	261.9	0.96	12	16	18	48	85	51.1	31	7.8	1.61	3.9	76	411	5.32	5.6	1.95	284
No MAFLD	male	50	No	8	22.59	0	23	17	23	84	75.7	47.6	17.1	5	3.11	4.6	49	260	6.54	6.1	3.25	213
No MAFLD	male	49	No	3	2.22	0.03	32	50	20	69	85.3	53.3	21.5	5.4	5.08	5.1	97	379	6.01	3.6	1.07	171
No MAFLD	male	31	No	1	1101.55	14.08	24	21	34	81	79.8	45.2	13.9	4.7	2.1	4.45	57	390	4.88	7.1	1.66	179
No MAFLD	male	50	Yes	2	836.66	14.68	47	37	96	143	81.2	46.7	7	2.6	6.26	4.12	68	329	6	7.9	1.53	159
No MAFLD	male	33	No	3	959.24	0.02	14	21	15	56	76	47.2	6.4	2.4	8.4	2.8	34	410	5.41	6.3	1.45	349
No MAFLD	female	43	No	2	42.2	0	10	17	7	60	76.4	45.6	6.9	2.7	4.7	3.4	54	249	4.95	4.6	3.31	264
No MAFLD	male	32	No	5	331.89	0.24	10	16	17	55	70	47.4	12.4	4.2	2.73	4.26	85	254	6.27	5.1	0.93	210
No MAFLD	male	33	No	4	476.74	17.06	18	15	10	69	75.9	51	21.8	7.6	4.13	3.86	69	348	5.67	3.2	1.68	130
No MAFLD	male	18	No	6	1422.94	0	39	27	29	314	73.5	50.1	9.2	3.4	1.41	5.76	48	314	5.43	6.3	1.37	247
No MAFLD	male	45	No	2	1.47	0.01	47	37	25	74	72.7	49.2	15.1	5.4	4.34	4.86	76	367	5.89	5.6	1.89	202
No MAFLD	male	51	No	6	946.16	10.36	44	26	51	89	72	47.8	11.6	3.9	3.63	2.61	73	262	5.8	6.2	2.56	189
No MAFLD	male	38	No	2	362.94	0.31	38	26	48	68	78.3	48.3	7.2	2.5	6.2	5.8	64	444	5.78	3	0.86	150
No MAFLD	female	36	No	1	1297.81	0.75	11	13	14	66	79.8	48.9	8.6	3.4	2.03	4.5	68	301	4.86	5.4	1.38	323
No MAFLD	female	41	No	2	3447.63	13.94	8	15	8	38	73.8	43.8	11.2	4.1	3.98	4.2	55	267	5.61	5.6	2.21	211
No MAFLD	male	53	No	3	956.1	3.14	23	25	15	74	74.6	54.1	18	5.3	1.92	4.7	69	214	5.67	4	4.24	132
No MAFLD	male	41	No	2	184.31	645.84	31	21	24	58	78	48.7	7.3	1.9	2.98	5.1	64	280	6.06	7.2	2.94	202
No MAFLD	female	44	Yes	4	107.2	0.01	17	22	12	47	71	46.8	22.8	7.8	2.75	3.72	46	311	5.75	3.4	0.66	165
No MAFLD	male	37	Yes	6	400.35	0.89	32	19	35	92	71.6	48.1	10.8	4.4	2.8	6.6	58	357	4.8	5.3	2.78	178
No MAFLD	male	49	No	4	564.83	47.89	16	17	24	58	75	50	13	4.6	5.6	2.68	69	468	5.6	7.2	3.37	243
No MAFLD	female	41	Yes	1	3551.14	0.02	10	16	10	69	68.1	44.8	6.5	2.9	3.62	3.1	49	205	5.79	2.3	0.48	236
No MAFLD	male	44	No	20	244.27	0.03	33	24	25	64	75.2	46	10.6	4.5	4.36	5.58	89	383	5.19	5.6	2.14	188
No MAFLD	male	48	No	8	1091.56	0.73	24	21	28	74	75.7	44.8	14.9	5.1	4.26	5.66	88	319	5.24	7.5	1.97	265
No MAFLD	male	43	No	10	68.37	0.51	21	17	17	80	76.2	47.5	16.7	6.6	1.33	4.3	61	301	5.13	5.5	1.45	176
No MAFLD	female	37	No	4	189.35	1.61	7	11	13	62	76	47.9	9.5	3.6	4.53	5	52	301	4.36	7.9	4.68	222
No MAFLD	male	32	No	13	372.57	3.08	14	16	22	64	75.1	47.9	8.6	3.8	2.4	3.91	83	387	6.16	4.8	1.77	234
No MAFLD	male	40	No	1	2.33	0.16	31	19	11	77	69	46	10	4.3	3.03	4.94	62	334	5.91	9.6	2.12	275
No MAFLD	male	48	Yes	2	1004.35	592.63	11	17	9	53	74.6	44.4	7.1	3.1	3.65	3.77	52	167	5.87	6.5	2.03	218
No MAFLD	male	49	Yes	5	295.37	0.06	16	25	19	76	73.1	46.5	15.8	6.4	2.14	5.8	74	338	5.8	5.2	1.34	109
No MAFLD	male	25	No	5	429.8	0.06	9	13	12	71	74.4	47.3	20.9	7.2	1.69	4.56	70	329	6.04	5.6	1.14	178
No MAFLD	female	46	No	2	83.76	0	12	13	18	35	73.9	49.6	10.3	4.1	2.44	4.29	48	200	6.1	6.4	3.16	214
No MAFLD	male	59	No	6	137.57	0.26	11	19	11	59	71.6	46.9	14.8	5.7	2.8	5.56	71	215	4.96	5.9	4.15	141
No MAFLD	male	34	No	6	996.2	20.12	43	29	36	119	75.1	48.1	15.5	5.5	3.44	5.53	60	345	5.32	4.6	1.47	179
No MAFLD	male	34	No	3	3416.01	0.03	27	24	22	74	76	48	16	4.8	8.9	5.12	80	264	5.98	5.6	1.89	201
No MAFLD	male	35	No	1	819	0.02	19	19	13	55	70.4	44.4	11	4.3	3.8	7.29	73	258	4.59	4.5	0.79	144
No MAFLD	male	42	No	4	1230	0.41	15	20	15	113	80.8	46.7	17.4	7.1	2.6	3.62	50	437	5.86	5.4	1.89	226
No MAFLD	female	28	No	2	619.6	13.46	17	17	10	91	71.2	47.4	15.5	5.9	8.22	4.2	65	345	5.64	5.4	1.02	234
No MAFLD	female	35	No	5	1973.05	0.6	13	16	17	62	76.9	44.7	4	2.6	3.1	3.96	40	213	4.78	6.7	3.14	246
No MAFLD	male	32	No	1	735.4	0.07	35	23	26	60	75.4	50	13.5	4.2	4.6	5.9	73	406	5.29	6.1	1.16	163
No MAFLD	male	28	Yes	2	937.42	43.25	37	24	18	71	73.5	48.9	12.5	4.7	4.41	3.9	67	269	6.2	6.1	1.16	253
No MAFLD	male	37	No	5	815.93	0.03	20	22	14	100	76.4	48.5	10.9	5.1	2.16	4.64	70	278	5.8	10.9	7.48	262
No MAFLD	male	51	Yes	10	74.73	0.51	15	17	21	76	77.6	49.2	16.9	5.7	7.42	5.58	90	303	5.18	6.5	1.5	187
No MAFLD	male	27	No	1	1152.06	0.05	36	25	22	95	74.7	49.3	7	2.4	2.03	4.56	69	321	5.94	7.8	1.23	211
No MAFLD	male	26	No	3	2204.59	0.03	8	13	11	57	73.8	45.8	11.9	5.2	1.43	4.6	66	321	5.6	6.7	2.26	196
No MAFLD	male	38	No	9	120.6	0.08	74	40	62	96	80.5	50.9	20.1	6.7	1.95	5.5	69	328	5.26	5.4	2.09	209

## Sheet: 3 month
group	HBsAg(IU/mL)	HBeAg(C.O.I)	ALT,U/L	AST,U/L	GGT,U/L	ALP,U/L	WBC,×109/L	NC,×109/L	LC,×109/L	PLT,×109/L
MAFLD	960.19	0.02	140	90	315	82	4.7	1.75	1.7	104
MAFLD	86.05	0.17	62	54	70	68	2.8	1.59	0.9	110
MAFLD	261.27	0	119	53	115	80	3.2	1.16	1.7	180
MAFLD	17.9	0.87	78	67	136	70	4.4	2.8	1.1	135
MAFLD	812.13	0.9	39	23	47	68	6.9	3.78	2.5	181
MAFLD	267.08	0	72	53	92	81	3.7	1.6	1.3	127
MAFLD	14.44	0.03	37	31	69	77	4.7	2.68	1.5	171
MAFLD	4.5	0.02	86	47	65	61	3.6	1.97	1.1	82
MAFLD	123.63	0.02	68	56	78	63	3.3	1.38	1.5	139
MAFLD	447.42	0.05	60	41	44	109	3	1.33	1.2	112
MAFLD	78.12	0.01	170	78	117	87	2.2	0.58	1.2	76
MAFLD	387.43	11.13	47	33	46	85	2.2	1.18	0.7	96
MAFLD	0	0.04	132	86	50	89	4	1.96	1.3	133
MAFLD	53.07	0.1	34	28	52	63	3.7	2.1	1.8	106
MAFLD	1071.49	0	126	92	67	80	2.8	1.8	0.6	113
MAFLD	397.6	10.64	74	43	66	73	3.8	1.5	1.7	139
MAFLD	9.96	0	73	58	66	114	3.1	1.54	1.3	119
MAFLD	527.09	7.08	18	16	18	57	6.7	3.85	1.7	361
MAFLD	98.34	12.84	69	64	90	142	4.1	2.13	1.1	119
MAFLD	886.7	0.01	26	26	50	44	2	0.94	0.7	109
MAFLD	6.75	0.1	41	36	89	73	3.6	1.53	1.5	111
MAFLD	0.01	0.02	100	59	40	90	2.6	1.11	0.9	105
MAFLD	10.02	0.02	61	49	39	88	4.8	1.89	2.1	140
MAFLD	627.84	19.91	34	81	178	98	2.8	1.61	0.8	85
MAFLD	745.41	0.58	47	93	155	107	2.8	1.29	1.2	93
MAFLD	582.56	0.42	48	41	65	84	2	0.89	0.8	87
MAFLD	293.83	0.02	45	40	161	107	4.5	2.1	1.6	101
MAFLD	835.62	3.3	264	144	208	80	2.59	1.4	0.9	95
MAFLD	1.64	0.4	69	38	92	81	6.86	5.46	0.66	143
MAFLD	24.86	118.31	51	33	29	76	4.2	2.35	1.5	131
MAFLD	29.12	0.02	254	143	306	155	2.6	1.05	1.2	96
MAFLD	4.31	0.04	106	166	165	82	3	1.07	1.6	84
MAFLD	0	0.02	69	64	109	68	3	1.57	1.1	140
MAFLD	239.1	1.35	57	45	70	75	3.3	1.67	1.1	97
MAFLD	374.53	0.03	58	34	190	56	3.2	1.4	1.5	99
MAFLD	347.15	83.46	28	32	95	83	6.5	2.93	2.9	132
MAFLD	234.32	0.02	113	43	54	110	6.3	3.65	2.1	292
MAFLD	26.3	0	33	39	54	49	3.5	1.28	1.7	68
MAFLD	46.07	57.63	79	43	71	69	5.3	2.48	2.3	172
MAFLD	0.06	0.82	40	33	59	67	2.6	1.09	1.1	156
MAFLD	47.98	6.77	60	34	108	69	2.7	1.41	1	83
MAFLD	440.23	5.61	49	41	38	109	4.5	2.54	1.4	90
MAFLD	89.95	0.07	62	58	196	59	5.2	3.32	1.3	86
MAFLD	908.26	18.58	72	45	62	97	4.6	2.04	1.9	99
MAFLD	51.7	0	54	41	73	61	3	1.41	1.3	121
MAFLD	41.53	20.08	52	40	96	86	2.3	1.27	0.7	92
MAFLD	56.89	0.28	79	43	60	78	3.9	1.47	1.9	120
MAFLD	851.54	31.74	101	45	172	74	4.9	1.91	2.5	136
MAFLD	2214	0.3	75	46	171	72	3.4	1.36	1.6	175
MAFLD	3122	0	41	42	59	80	3.2	2.18	0.6	99
MAFLD	2084.74	157.99	21	45	48	104	2.6	1.39	1	185
MAFLD	2.69	0.2	91	94	40	85	3.7	1.51	1.8	98
MAFLD	184.08	0.14	41	29	76	60	4	2.42	1.1	140
MAFLD	2633.32	62.14	17	26	23	57	3.9	1.72	1.8	163
MAFLD	1102.3	0.52	83	34	41	86	5.3	3.42	1.3	96
MAFLD	2510.03	15.03	39	43	20	113	3.1	1.92	0.9	123
MAFLD	5038.91	1133.88	42	27	58	62	2.4	1.32	0.7	91
MAFLD	1090	18.87	28	28	36	80	3.3	1.82	0.9	84
MAFLD	2465.83	723.34	75	45	54	92	3.6	1.62	1.7	192
MAFLD	789.06	0.02	138	64	92	83	2.9	1.37	1.1	127
MAFLD	71.03	0.24	101	62	88	66	3.3	1.71	1.3	101
MAFLD	3592	0.28	87	59	197	87	3.2	1.72	1.1	144
MAFLD	41.12	0.12	78	88	108	75	3.9	2.1	1.4	118
MAFLD	927.21	15.97	19	13	40	62	3.3	1.62	1.4	135
MAFLD	32.17	0.03	77	82	58	79	2.9	1.27	0.27	136
MAFLD	1043	0.14	91	62	235	89	3.9	1.7	1.7	123
MAFLD	1172.79	75.78	20	22	22	89	3.7	2.03	1.2	188
No MAFLD	158.37	0.02	41	49	33	63	5.2	3.68	1.2	108
No MAFLD	0.25	0	87	42	44	86	2	1.19	0.6	90
No MAFLD	1249.95	4.48	146	99	58	102	4	2.36	1.1	85
No MAFLD	5676.44	64.32	21	27	78	55	4.1	2.85	0.8	85
No MAFLD	512.91	0.02	57	50	39	82	2	0.73	1.1	91
No MAFLD	952.87	0.04	108	89	117	93	3.8	2.54	0.9	91
No MAFLD	803.22	3.52	32	21	37	65	3.8	2.48	0.9	112
No MAFLD	83.33	0.05	332	334	298	88	3.5	1.32	2	96
No MAFLD	2973	76.23	29	21	34	54	3.6	1.88	1.2	160
No MAFLD	626.29	13.26	72	63	94	60	2.2	0.97	0.9	103
No MAFLD	1.64	0.02	110	66	104	62	4.2	1.88	2	120
No MAFLD	562.71	2.85	65	65	49	91	3.4	2.12	0.9	83
No MAFLD	426.5	0.08	40	33	25	64	4	2.2	1.3	125
No MAFLD	10.56	0.04	31	31	40	69	3.7	1.72	1.3	98
No MAFLD	684.15	0	20	25	15	79	2.3	1.42	0.7	82
No MAFLD	11.78	0.03	66	45	45	62	2.6	0.62	1.5	113
No MAFLD	3.68	0.56	81	51	46	72	4.2	2.07	1.6	129
No MAFLD	2067.33	3.66	62	78	48	67	2.6	0.98	1.2	111
No MAFLD	31.05	0	60	32	82	84	2.4	1.19	0.9	82
No MAFLD	18.44	1.42	93	86	218	102	2.6	1.29	0.8	55
No MAFLD	0.57	0.09	34	32	40	72	2.9	1.11	1.4	94
No MAFLD	4.12	1.58	46	31	49	56	3.2	1.35	1.5	89
No MAFLD	745.08	0.03	152	209	49	70	2	1.02	0.7	90
No MAFLD	0.02	1.75	48	50	58	54	4.6	2.41	1.6	153
No MAFLD	722.77	19.18	44	38	33	91	3.2	2.13	0.8	122
No MAFLD	557.43	0.01	26	52	47	92	2.9	1.61	1	118
No MAFLD	1084.83	58.87	45	35	22	68	3.5	2.15	1	132
No MAFLD	1568.44	0.45	16	59	112	68	3.1	1.92	0.89	140
No MAFLD	3133.42	1104.88	58	35	43	86	2.8	1.23	1.1	106
No MAFLD	359.39	0.51	54	47	22	86	3.1	1.53	1.3	109
No MAFLD	5731.52	5.72	59	47	66	97	3	1.72	0.9	103
No MAFLD	324.28	0.56	108	76	264	158	2.6	1.15	1.1	65
No MAFLD	0.15	0.04	47	34	32	53	3.3	1.71	1.3	156
No MAFLD	6.52	0	79	72	63	83	2.9	1.71	0.9	71
No MAFLD	131.6	0.12	18	24	22	61	6.3	4.09	1.7	184
No MAFLD	83.33	0.05	332	334	298	88	3.5	1.32	2	96
No MAFLD	214.22	2.37	64	38	96	92	2.7	1.53	0.8	105
No MAFLD	507.51	8.88	34	69	74	85	4.6	3.03	1	101
No MAFLD	2067.33	3.66	62	78	48	67	2.6	0.98	1.2	111
No MAFLD	249.63	0.21	43	27	79	92	2.7	1.47	0.9	67
No MAFLD	1429.83	0	74	45	44	67	2	0.85	1	105
No MAFLD	12.32	0.05	75	46	39	134	2.5	1	1.3	81
No MAFLD	88.86	0.1	164	92	324	97	2.3	0.91	1	99
No MAFLD	0.58	0.1	38	40	74	67	2.6	1.36	0.9	61
No MAFLD	0.23	0	23	19	12	80	5.2	2.62	2	117
No MAFLD	0.01	0.03	61	30	173	70	3.8	1.53	1.8	97
No MAFLD	1.3	0.47	117	69	82	52	3.3	1.58	1.3	127
No MAFLD	0	0	93	70	66	88	2.3	1.04	0.9	123
No MAFLD	0	0.01	47	44	40	65	2.6	0.91	1.4	96
No MAFLD	908.26	18.58	72	45	62	97	4.6	2.04	1.9	99
No MAFLD	947.2	4.44	145	160	295	165	3.5	1.43	1.6	67
No MAFLD	105.6	0.02	68	58	68	81	2.7	1.05	1.2	183
No MAFLD	4.6	0	64	57	28	68	2.2	1.14	0.7	113
No MAFLD	387.15	0.26	21	21	36	62	3.5	1.83	1.3	131
No MAFLD	15.52	7.2	17	17	17	71	3.4	1.72	1.1	94
No MAFLD	987.34	0	72	64	72	86	3.3	1.8	1.6	112
No MAFLD	0	0.04	107	68	92	54	2.3	0.82	1.1	56
No MAFLD	307.18	8.03	60	47	58	87	4	2.32	1.3	176
No MAFLD	136.61	2.95	58	37	82	75	4.6	3.04	1	66
No MAFLD	456.72	0.34	72	67	104	135	3.5	1.6	1.3	108
No MAFLD	1139.61	7.39	10	19	18	57	4.5	3.42	0.7	130
No MAFLD	543.36	4.48	46	40	43	91	1.7	1.04	0.4	79
No MAFLD	44.95	212.1	98	59	111	74	3.9	2.04	1.3	143
No MAFLD	26.78	0.01	83	88	28	60	3.4	1.69	1.4	126
No MAFLD	134.05	0.9	61	37	59	94	2.7	1.57	0.7	90
No MAFLD	461.46	30.19	47	35	72	69	5.2	3.43	1.1	152
No MAFLD	1312.35	0	103	71	9	84	2.2	0.96	0.9	187
No MAFLD	161.6	0.05	46	32	56	82	3.4	2.14	1.1	90
No MAFLD	1019.69	0.46	48	41	47	69	3.2	1.61	1.1	148
No MAFLD	24.66	1.78	30	29	30	88	2.1	1.21	0.7	75
No MAFLD	80.58	0.01	30	32	26	72	3.3	2.04	0.9	89
No MAFLD	69.72	2.07	60	53	74	90	2.6	1.32	0.9	135
No MAFLD	1.84	0.15	32	24	15	86	4.7	2.13	1.9	174
No MAFLD	743	28.6	138	115	131	114	2.5	0.97	1.1	124
No MAFLD	367.3	0.03	38	56	37	66	2.5	1.24	0.9	76
No MAFLD	356.02	0.07	21	24	28	80	2.5	1.07	1.1	97
No MAFLD	20.54	0	53	40	63	44	3.3	1.62	1.2	124
No MAFLD	26.86	0.08	103	91	34	77	2.7	1.38	1	55
No MAFLD	909.5	5.52	39	36	31	99	2.7	1.02	1.3	114
No MAFLD	501.4	0.02	65	59	36	92	2.2	1.2	0.8	123
No MAFLD	722.93	0.02	139	62	62	67	2.3	0.82	1.2	89
No MAFLD	987.34	0.26	45	37	22	101	2.9	1.48	1.1	155
No MAFLD	316.28	1.67	35	37	34	102	4.1	1.97	1.8	116
No MAFLD	1565.52	0.53	83	86	61	86	3.8	2.16	1.3	107
No MAFLD	520.1	0.02	42	35	35	69	2.5	0.78	1.5	71
No MAFLD	652.68	26.61	48	31	39	90	2.9	1.26	1.5	160
No MAFLD	246.9	0.01	56	71	64	76	6.4	4.63	1.1	164
No MAFLD	7.38	0.32	40	31	37	80	3.9	1.77	1.7	118
No MAFLD	1850	0.08	41	32	26	127	5.5	3.04	1.8	92
No MAFLD	1312.16	0.02	71	55	31	92	2.6	1.5	0.8	74
No MAFLD	40.7	0.08	87	63	111	89	3.3	1.8	1	78

## Sheet: 6 month
group	HBsAg(IU/mL)	HBeAg(C.O.I)	ALT,U/L	AST,U/L	GGT,U/L	ALP,U/L	WBC,×109/L	NC,×109/L	LC,×109/L	PLT,×109/L
MAFLD	64.11	0.01	88	70	242	74	4.8	2.47	1.7	126
MAFLD	9.74	0.16	143	100	216	68	2.5	0.98	1.3	88
MAFLD	89.19	0.04	97	42	95	80	3.1	1.13	1.6	167
MAFLD	1.61	0.44	130	104	284	80	8.4	6.66	1.1	122
MAFLD	730.35	0.64	30	25	50	67	5.9	3.41	2	114
MAFLD	264.3	0.11	31	20	47	63	4.5	2.41	1.4	242
MAFLD	5.4	0.05	38	37	84	68	4.4	2.36	1.5	170
MAFLD	0.61	0.02	69	40	81	49	3.4	1.65	1.1	106
MAFLD	101	0.02	87	69	77	63	2.6	1.09	1.2	123
MAFLD	266.56	0.04	76	43	44	95	3.6	1.79	1.2	93
MAFLD	10.89	0.03	77	43	70	68	2.4	0.93	1.1	90
MAFLD	301.3	8.06	54	34	59	80	4.2	2.46	1	115
MAFLD	0	0.03	136	87	95	82	7.2	4.63	1.4	135
MAFLD	7.35	0.12	29	31	64	70	2.9	1.84	0.8	96
MAFLD	1324.72	0.02	37	25	78	87	3.9	2.08	1.4	128
MAFLD	334.09	9.24	119	75	97	67	3.5	1.55	1.55	81
MAFLD	9.11	0.01	56	42	68	110	3.8	2.29	1.2	105
MAFLD	343.1	7.05	238	263	117	74	4.4	2.57	1.1	250
MAFLD	7.02	0.73	49	53	81	138	3.4	2.09	0.8	141
MAFLD	526.25	0	28	24	55	44	1.8	0.77	0.7	107
MAFLD	1.29	0.14	48	42	91	89	3.4	1.48	1.6	120
MAFLD	0.02	0.02	58	47	27	95	2.7	1.42	0.8	110
MAFLD	0	0.05	52	42	63	89	4.5	1.87	1.7	150
MAFLD	373.08	16.86	107	96	162	106	2.5	1.29	0.8	93
MAFLD	465.29	0.36	57	37	69	97	2.5	1.08	1.1	85
MAFLD	534.22	0.51	43	48	113	103	2.2	1.15	0.8	108
MAFLD	34.83	0	40	23	179	86	4.3	2.01	1.4	136
MAFLD	308.11	1.69	184	120	172	81	2.75	1.8	1.33	86
MAFLD	0.14	0.38	84	60	106	220	3.03	1.93	0.55	163
MAFLD	8.81	53.99	47	27	26	72	3.5	1.72	1.5	118
MAFLD	3.92	0	120	70	255	138	2.7	0.91	1.3	127
MAFLD	0	0.01	162	254	229	75	2.5	0.82	1.4	93
MAFLD	0	0.03	36	41	73	73	3	1.59	1	149
MAFLD	204.01	1.38	52	44	90	86	2.9	1.48	1	88
MAFLD	274.4	0.02	50	34	130	62	2.7	1.13	1.3	112
MAFLD	147.39	51.51	55	46	174	66	8	4.82	2.3	122
MAFLD	80.62	0.04	163	81	93	94	6.6	4.78	1.4	213
MAFLD	19.78	0	35	36	83	45	3.5	1.24	1.7	92
MAFLD	34.23	48.6	56	38	71	69	4.5	2.26	1.8	160
MAFLD	0	0.44	38	39	70	76	2.5	1.11	1	163
MAFLD	13.2	7.85	37	27	104	70	3.4	2.29	0.8	85
MAFLD	402.51	6.12	27	28	35	96	3.7	1.96	1.3	93
MAFLD	15.3	0.03	40	37	186	58	3.2	1.73	1.1	60
MAFLD	648.19	13.23	54	43	70	81	4	1.81	1.6	96
MAFLD	52.68	0	58	38	73	65	3.7	2	1.26	128
MAFLD	11.04	14.35	55	41	100	79	2.5	1.29	0.8	103
MAFLD	7.33	0.14	66	45	91	76	4.1	2.26	1.2	118
MAFLD	661.24	31.77	72	39	181	82	4.9	2.93	1.5	152
MAFLD	2043.98	0.24	60	42	168	78	3.8	1.9	1.3	109
MAFLD	1930	0.01	74	50	93	67	3.1	1.73	0.9	137
MAFLD	623.95	80.55	65	36	41	90	2.1	1.05	0.9	171
MAFLD	0.43	0.2	70	50	36	67	3.3	1.52	1.4	111
MAFLD	37.17	0.08	76	45	63	64	3.7	1.76	1.4	137
MAFLD	2353.27	48.96	18	21	26	57	3.8	1.75	1.7	169
MAFLD	902.34	0.72	65	35	51	99	3.4	1.72	1.3	112
MAFLD	1808.35	11.62	64	64	46	111	3	1.52	1.1	130
MAFLD	2713.83	552.83	55	32	69	63	2	0.9	0.9	96
MAFLD	873.46	13.56	34	33	33	83	5.7	4.13	1	90
MAFLD	1907.74	453.1	86	72	63	86	2.9	1.25	1.4	142
MAFLD	375.09	0	204	117	303	85	3.6	2.22	0.8	130
MAFLD	48.04	0.26	136	81	158	74	3.6	1.76	1.5	128
MAFLD	1787.02	0.79	46	35	165	81	3.5	1.53	1.6	188
MAFLD	2.74	0.02	134	178	170	87	3.7	2.78	0.6	112
MAFLD	791.09	8.84	24	18	45	66	5.2	3.37	1.6	241
MAFLD	7.81	0.01	108	99	92	78	2.9	1.34	1.3	147
MAFLD	320.63	0.17	102	77	371	91	3.9	1.35	2	135
MAFLD	794.93	37.38	25	27	29	74	4.3	1.77	1.7	169
No MAFLD	11.25	0.03	37	44	49	58	7.5	1.6	1.4	79
No MAFLD	0.04	0	84	51	57	73	2.1	1.1	0.8	87
No MAFLD	688.22	3.96	46	28	33	85	4	2.46	1.1	86
No MAFLD	5015.57	65.46	53	47	70	40	3.5	1.92	1.1	109
No MAFLD	365.63	0.02	60	46	40	65	2.1	0.7	1.1	101
No MAFLD	68.58	0.02	78	76	113	78	1.9	1.02	0.6	104
No MAFLD	377.6	2.46	36	30	60	68	3.4	1.66	1.3	88
No MAFLD	46.07	0.04	294	354	437	90	3.5	0.97	2.3	86
No MAFLD	1536.51	101.93	33	21	40	53	4	1.82	1.7	199
No MAFLD	508.71	10.82	16	18	138	69	2.6	1.1	1.1	108
No MAFLD	1.84	0.02	66	57	76	67	4.3	1.77	2.1	136
No MAFLD	356.8	2.01	65	63	33	84	3.4	1.86	1.4	81
No MAFLD	41.55	0.11	47	40	29	66	2.4	1.2	0.8	159
No MAFLD	0.05	0.03	57	47	52	60	3.4	1.59	1.2	83
No MAFLD	587.9	0	20	23	16	76	2	0.93	0.8	86
No MAFLD	0.31	0.03	40	32	44	61	3	1.05	1.4	91
No MAFLD	3.35	0.72	13	14	17	40	5.4	2.29	2.6	280
No MAFLD	1380.19	0.03	48	60	57	71	3.8	2.28	1.1	122
No MAFLD	103.77	0.01	41	30	67	74	3.3	2.05	0.8	86
No MAFLD	3.29	0.96	42	53	136	81	1.8	0.88	0.7	44
No MAFLD	0	0.04	24	26	24	64	2.8	1.47	0.8	81
No MAFLD	0.71	1.61	25	22	38	51	3.2	1.48	1.3	93
No MAFLD	473.41	0.01	23	50	16	52	4.1	2.22	1.3	183
No MAFLD	0.12	0.98	30	33	67	53	3.8	1.78	1.2	168
No MAFLD	623.4	8.31	42	42	40	83	3.5	2.03	1.1	130
No MAFLD	602.08	0	28	30	41	91	3.4	1.63	1.3	141
No MAFLD	871.46	70.51	35	33	19	61	3.5	1.9	1.1	134
No MAFLD	452.87	0.14	16	43	93	54	3.6	2.62	0.7	170
No MAFLD	1863.63	598.88	42	31	32	78	2.6	1.27	1	116
No MAFLD	122.29	0.39	37	39	22	80	2.9	1.24	1.5	113
No MAFLD	4986.36	5.67	29	21	56	106	3.3	2.14	0.8	100
No MAFLD	203.64	0.16	28	26	215	125	2.4	0.86	1.1	83
No MAFLD	0	0.02	32	23	35	44	3	1.67	1.1	112
No MAFLD	0.17	0.07	47	54	46	78	2.4	1.15	1	71
No MAFLD	111.85	0.09	14	24	24	59	4.8	3.38	0.9	135
No MAFLD	46.07	0.04	234	132	303	79	3.2	1.03	2	84
No MAFLD	0.74	0.99	29	24	77	81	2.9	1.46	0.8	125
No MAFLD	390.75	8.62	28	60	58	78	3	1.64	1	92
No MAFLD	1380.19	0.03	48	60	57	71	3.8	2.28	1.1	122
No MAFLD	185.69	0.1	55	40	128	130	3	1.55	1.1	57
No MAFLD	238.69	0	89	49	41	68	2.5	1.1	1.1	92
No MAFLD	3.68	0.08	32	22	25	102	4	2.29	1.4	192
No MAFLD	0	0.06	139	101	629	108	2.6	1.17	1	80
No MAFLD	0	0.02	33	33	62	82	4	2.2	1.3	72
No MAFLD	0.18	0	22	23	10	71	6.3	3.04	2.6	104
No MAFLD	0	0.01	49	25	132	54	4.1	1.98	1.6	124
No MAFLD	0	0.13	98	78	64	58	5	2.48	1.9	141
No MAFLD	0	0.02	43	32	51	76	3.2	1.75	1	121
No MAFLD	0.01	0.07	38	32	56	67	2.7	0.92	1.3	106
No MAFLD	648.19	13.23	54	43	70	81	4	1.81	1.6	96
No MAFLD	479.1	2.34	101	122	538	123	3.1	1.52	1.2	71
No MAFLD	4.16	0.03	113	117	74	53	3.1	1.58	1.1	168
No MAFLD	0.18	0	51	54	35	35	2.2	1.18	0.7	116
No MAFLD	285.23	0.14	17	18	30	51	2.7	1.1	1.1	134
No MAFLD	2.87	3.4	23	18	22	68	2	0.84	0.9	87
No MAFLD	632.32	0.04	94	89	142	230	3.2	1.43	1.4	118
No MAFLD	0	0.02	44	36	70	51	3.2	1.29	1.5	68
No MAFLD	174.58	6.7	85	59	90	103	4.4	2.84	1.2	145
No MAFLD	151.01	2.31	70	44	100	69	2.9	1.51	1	77
No MAFLD	16.51	0.5	57	80	85	116	3.5	1.93	1.3	82
No MAFLD	1096.76	4.71	20	27	23	68	2.3	1.26	0.8	134
No MAFLD	1.02	0.45	40	45	72	93	1.7	1	0.3	76
No MAFLD	0.98	127.58	86	86	126	78	3.2	1.6	1.2	146
No MAFLD	3.78	0.01	28	30	29	61	3.6	1.98	1.3	147
No MAFLD	24.68	0.86	39	30	57	82	2.7	1.61	0.7	83
No MAFLD	445.19	24.79	34	39	34	53	3.2	1.84	1	141
No MAFLD	1370.56	0	43	48	19	77	1.9	0.76	0.8	184
No MAFLD	150.1	0.03	49	35	95	94	4.2	2.52	1.4	129
No MAFLD	393.46	0.26	35	31	63	68	3.4	1.76	1.2	161
No MAFLD	17.69	1.85	24	20	29	101	1.6	0.73	0.7	68
No MAFLD	13.89	0.03	13	22	15	66	3.5	2.32	0.9	113
No MAFLD	5.21	0.24	61	41	61	77	2.8	1.27	1.1	126
No MAFLD	1.41	0.17	37	24	23	64	4.6	1.96	1.9	164
No MAFLD	259.53	13.36	106	101	61	101	1.7	0.79	0.5	105
No MAFLD	119.6	0.02	43	58	41	65	2.7	1.41	0.9	67
No MAFLD	271.86	0.07	31	34	55	80	2.3	0.65	1.4	81
No MAFLD	1.43	0.04	16	25	50	35	3	1.4	1.3	104
No MAFLD	1.42	0.04	42	45	40	71	2.2	0.72	1.2	54
No MAFLD	61.33	11.51	59	50	30	96	3.3	1.34	1.5	98
No MAFLD	319.69	0.03	54	46	47	115	2.2	1.1	0.9	143
No MAFLD	135.65	0.02	41	37	20	49	2.7	1	1.4	106
No MAFLD	722.81	0.2	49	38	64	102	2.8	1.47	0.9	153
No MAFLD	8.07	0.03	29	27	36	94	3	1.63	1.1	113
No MAFLD	294.92	0.03	59	74	86	83	3.8	1.93	1.3	132
No MAFLD	488.5	0.01	34	28	40	62	2.8	1.15	1.4	79
No MAFLD	501.85	31.13	56	60	46	84	2.7	1.03	1.5	146
No MAFLD	86.72	0.01	72	76	83	78	4.2	2.3	1.8	176
No MAFLD	1.91	0.48	40	28	38	75	3.7	1.79	1.4	120
No MAFLD	1568	0.09	32	32	25	103	3.8	1.6	1.9	98
No MAFLD	529.88	0	62	52	25	65	3	1.36	1.2	81
No MAFLD	7.48	0.08	87	67	93	85	2.7	1.37	1	78

## Sheet: 12 month
group	HBsAg(IU/mL)	HBeAg(C.O.I)	ALT,U/L	AST,U/L	GGT,U/L	ALP,U/L	WBC,×109/L	NC,×109/L	LC,×109/L	PLT,×109/L
MAFLD	40.99	0.02	63	40	173	72	5	2.81	1.6	143
MAFLD	3.46	0.23	112	72	341	72	2.8	1.46	1.1	153
MAFLD	26.04	0.02	54	31	108	81	3.9	1.63	1.8	155
MAFLD	0	0.6	129	112	341	71	4.1	2.33	1.2	123
MAFLD	491.93	0.44	29	24	42	67	5.7	3.65	1.7	134
MAFLD	231.09	0.03	30	22	36	89	2.8	0.93	1.3	145
MAFLD	0.68	0.02	33	37	97	57	3.5	1.77	1.2	167
MAFLD	0.11	0.03	43	30	48	47	3	1.62	0.8	91
MAFLD	86.14	0.01	24	24	14	72	4.05	2.1	1.46	153
MAFLD	114.1	0.05	51	33	53	91	3.2	1.53	1.1	95
MAFLD	4.22	0.02	38	34	41	67	3.1	1.44	1.1	91
MAFLD	286.17	10.09	39	25	45	74	2.1	1.23	0.6	108
MAFLD	0.01	0.02	21	19	17	75	6.6	3.98	1.9	217
MAFLD	0.39	0.04	21	26	53	64	3.8	2.14	1.2	121
MAFLD	1183	0.01	21	16	25	81	5.7	3.7	1.5	289
MAFLD	356.8	7.86	28	18	26	68	4.05	2.3	1.86	158
MAFLD	12.58	0	21	10	38	78	2.9	1.42	1.2	117
MAFLD	262.85	7.53	85	70	106	82	2.9	1.86	0.7	239
MAFLD	4.62	0.02	46	49	66	126	3.5	2.33	0.7	114
MAFLD	258.96	0.01	16	16	39	39	3.5	2.4	0.8	150
MAFLD	0.03	0.04	64	51	83	69	4.1	2.23	1.5	148
MAFLD	0.49	0	35	34	32	89	3.5	1.73	1.1	132
MAFLD	0.01	0.04	16	20	19	63	6.8	4.19	1.7	271
MAFLD	276.32	24.56	18	20	31	56	5.3	2.78	1.8	165
MAFLD	283.15	0.1	22	19	35	72	2.9	1.39	1.2	83
MAFLD	522.73	0.39	31	36	42	94	4.02	2	1.1	153
MAFLD	30.45	0	28	26	132	72	4.8	2.5	1.4	113
MAFLD	83.52	0.81	77	56	72	69	3.31	2.6	1.37	103
MAFLD	0	0.34	63	62	86	75	2.24	1.17	0.57	145
MAFLD	3.76	3.29	26	17	22	58	5.5	3.39	1.7	240
MAFLD	3.56	0.01	63	41	90	92	3	1.74	0.9	158
MAFLD	0	0.01	38	49	69	59	4.9	1.69	2.8	162
MAFLD	0	0.05	26	24	42	57	5.2	2.85	2	183
MAFLD	154.84	1.15	107	70	73	68	7.3	5.37	1.2	111
MAFLD	184.07	0	27	15	54	76	5.3	2.66	2.2	229
MAFLD	136.83	38.98	41	29	108	49	7.3	4.49	2.1	226
MAFLD	2.48	0.03	122	59	136	98	4.05	2.3	1.7	153
MAFLD	20.84	0	23	28	81	48	4.4	1.73	2	122
MAFLD	24.75	56.89	34	19	68	66	6.7	3.95	2.1	193
MAFLD	0.01	0.06	24	28	36	56	3.4	1.5	1.34	201
MAFLD	2.43	7.47	27	22	82	65	3.4	2.04	0.9	109
MAFLD	343.9	6.47	15	16	23	111	4.05	2.3	1.56	153
MAFLD	5.73	0.01	40	39	163	62	5.5	4.15	0.9	65
MAFLD	108.59	6.92	62	44	82	73	3.5	1.8	1.1	87
MAFLD	14.81	0.02	30	24	63	59	3.8	2.14	1.2	161
MAFLD	3.37	20.15	55	41	118	81	2.2	1.31	0.6	109
MAFLD	5.42	0.2	35	34	60	67	2.7	1.04	1.3	97
MAFLD	307.43	11.84	122	73	193	85	3.7	1.94	1.4	124
MAFLD	1656	0.16	43	34	131	56	3.2	1.38	1.4	175
MAFLD	152.3	0	41	35	72	58	3.8	2.36	0.8	99
MAFLD	233.23	44.42	43	40	42	95	2.5	1.35	0.9	193
MAFLD	0	0.28	72	52	39	60	3.3	1.34	1.6	128
MAFLD	0.63	0.01	77	52	85	61	3.3	1.69	1.1	128
MAFLD	2159.26	75.65	18	22	18	54	5.8	3.13	2.3	305
MAFLD	747.1	0.47	56	35	40	72	4.3	2.5	1.4	89
MAFLD	734.26	10.63	29	27	22	90	4.1	2.22	1.5	264
MAFLD	1845.39	844.82	32	19	44	48	2.8	1.56	1.05	153
MAFLD	655.3	8.2	30	31	26	71	2.9	1.33	1.1	72
MAFLD	733.92	198.86	46	39	58	93	4	2.26	1.5	187
MAFLD	97.69	0.03	169	105	279	91	2.4	1.58	0.5	118
MAFLD	23	0.15	119	86	154	61	3.5	1.75	1.4	97
MAFLD	1774.85	0.86	25	20	43	55	5.8	3.56	1.8	244
MAFLD	5.14	0.06	45	55	53	74	6.4	4.5	2.2	215
MAFLD	629.72	10.68	21	16	45	71	5.2	2.77	2	205
MAFLD	0.78	0.03	44	36	52	78	2.8	1.53	1.1	159
MAFLD	420.46	0.13	76	54	257	85	3.6	2.4	2.1	168
MAFLD	657.16	52.5	34	31	41	78	3.3	1.57	1.1	202
No MAFLD	0.88	0.01	56	54	68	65	2.9	1.55	1.1	75
No MAFLD	0	0.03	25	20	35	69	1.5	0.68	0.6	75
No MAFLD	526.45	0.68	32	22	27	82	4	1.85	1.6	80
No MAFLD	3912.09	48.39	44	33	75	40	3.5	2.06	1	97
No MAFLD	222.04	0	15	24	16	81	2.6	1.32	1.1	158
No MAFLD	0.35	0.02	39	39	82	70	2.5	1.27	0.8	108
No MAFLD	317.07	1.58	30	24	65	72	3	1.55	1	99
No MAFLD	40.48	0.05	91	82	123	88	5.8	2.76	2.7	142
No MAFLD	2600	37	38	22	24	49	6.2	2.58	1.4	4.24
No MAFLD	844.24	19.09	78	36	59	63	4.8	2.66	1.8	196
No MAFLD	1.95	0.03	13	19	31	66	7.4	4.13	2.9	203
No MAFLD	207.83	2.01	27	34	17	85	2.9	1.78	0.8	71
No MAFLD	0.16	0.12	27	26	40	55	2	0.95	0.8	204
No MAFLD	0	0.01	18	19	36	47	7.3	5.16	1.5	199
No MAFLD	570.94	0.05	21	24	15	60	1.7	0.7	0.7	76
No MAFLD	0	0.04	28	28	42	72	6.4	2.91	2.8	189
No MAFLD	152.06	0.03	8	11	13	64	5.8	2.84	2.4	290
No MAFLD	1084.47	0.01	30	41	26	60	2	0.83	0.9	108
No MAFLD	65.18	0.01	19	14	37	102	7.3	4.7	1.9	228
No MAFLD	1.78	0.59	44	55	102	81	2.1	1.15	0.8	65
No MAFLD	0	0.03	27	25	17	68	3.6	2.11	1	201
No MAFLD	0	1.19	17	20	42	50	3.3	1.78	1.2	73
No MAFLD	124.19	0.02	65	121	48	69	2.8	1.55	0.9	103
No MAFLD	0	0.85	27	39	58	50	3.5	1.57	1.4	181
No MAFLD	544.74	15.71	23	29	42	108	3.3	2.1	0.8	175
No MAFLD	188.37	0	58	50	55	92	3.5	1.37	1.8	146
No MAFLD	1115.62	57.48	36	36	20	61	3.7	2.1	1.2	144
No MAFLD	356.1	0.04	20	24	27	51	2.9	1.72	0.8	202
No MAFLD	936.43	309.04	24	21	32	68	3.6	2.02	1.1	139
No MAFLD	174.41	0.31	30	31	19	75	3.2	1.06	1.9	101
No MAFLD	5950.63	6.44	13	11	19	84	4	2.46	1.2	181
No MAFLD	210.95	0.04	21	21	76	76	2.7	1.05	1.2	94
No MAFLD	0	0.02	27	24	21	72	3.7	2.02	2.2	138
No MAFLD	0	0.05	26	26	32	69	3.6	2.56	1.4	192
No MAFLD	151.99	0.02	8	17	14	51	3.7	2.6	2.4	138
No MAFLD	38.67	0.05	91	82	123	88	5.8	2.76	2.7	142
No MAFLD	0.2	0.45	29	20	67	65	3.1	2.01	0.6	99
No MAFLD	346.46	12.46	18	19	20	67	5.3	3.1	1.7	204
No MAFLD	917.97	0.06	16	25	13	59	4.4	2.53	1.6	243
No MAFLD	141.12	0.13	21	19	31	136	4.3	2.74	1.4	141
No MAFLD	251.7	0	56	32	26	55	2.6	1.5	0.8	114
No MAFLD	10.34	0.09	43	21	18	82	4.5	2.02	1.8	204
No MAFLD	0	0.03	93	64	314	100	3.9	1.87	1.4	105
No MAFLD	0	0.01	52	50	72	75	3.8	2.1	1.3	65
No MAFLD	0.08	0	31	21	12	77	6.1	4.08	2.1	104
No MAFLD	0	0.03	24	20	95	51	5.8	3.55	1.6	118
No MAFLD	0	0.08	32	46	42	72	3.7	2.2	2.2	138
No MAFLD	0.01	0.06	29	20	24	83	5.2	3.46	1.2	184
No MAFLD	0	0.02	25	26	26	72	3.7	2.02	1.6	136
No MAFLD	108.59	6.92	62	44	82	73	3.5	1.8	1.1	87
No MAFLD	8.32	3.24	103	170	366	104	3.9	1.62	1.8	84
No MAFLD	0.06	0.01	12	14	12	43	5.2	2.66	1.9	297
No MAFLD	0	0.03	24	33	32	64	2.9	1.94	0.7	135
No MAFLD	292.11	0.09	10	15	17	48	4.1	1.86	1.8	182
No MAFLD	0.13	1.4	16	16	18	72	2.5	1.44	0.8	90
No MAFLD	189.45	0.01	95	53	56	135	2.9	1.74	0.8	89
No MAFLD	0	0.04	36	28	27	55	3.7	2.2	2.1	98
No MAFLD	73.14	5.28	49	74	149	87	4.3	3.11	0.8	191
No MAFLD	379.5	3.4	31	23	61	55	3.2	1.65	1.1	83
No MAFLD	5.46	0.29	21	30	33	88	2.8	0.96	1.6	129
No MAFLD	321.98	1.38	16	23	23	59	2.6	1.72	0.6	125
No MAFLD	0.28	0.9	44	32	86	101	2.7	2.04	0.3	86
No MAFLD	0.19	15.02	112	68	158	64	4.3	2.19	1.7	139
No MAFLD	0	0	26	29	27	62	3.3	1.66	1.2	165
No MAFLD	10.55	0.56	31	25	62	74	2.6	1.54	0.8	84
No MAFLD	380.32	41.77	15	17	20	50	3.8	2.02	1.4	142
No MAFLD	1624.28	0.02	22	28	18	68	2.3	1	1	192
No MAFLD	140.78	0	23	22	58	78	3.8	2.07	1.4	100
No MAFLD	230.04	0.08	18	18	23	46	4.3	2.3	1.6	212
No MAFLD	29.51	0.96	13	15	16	82	3.4	2.34	0.7	113
No MAFLD	2.9	0.1	7	12	8	65	5	2.85	1.6	157
No MAFLD	0.07	0	36	32	42	72	2.3	1.16	0.8	130
No MAFLD	1.89	0.11	12	14	11	71	7	3.73	2.6	279
No MAFLD	324.51	16.29	26	31	23	75	2.1	0.86	0.9	140
No MAFLD	80.21	0.02	11	21	19	58	3.2	1.53	1.5	135
No MAFLD	334.68	0.09	13	15	15	83	5.3	2.33	2.5	225
No MAFLD	0.13	0	12	14	38	33	5.6	3.51	1.4	168
No MAFLD	0	0	41	52	50	64	2.6	1.29	1	57
No MAFLD	1.04	4.08	30	34	29	83	2.7	1.08	1.2	140
No MAFLD	1920	0.03	46	37	28	108	2.9	1.77	0.9	119
No MAFLD	57.67	0	36	32	27	61	1.8	0.61	1	83
No MAFLD	1632	0.1	38	35	59	87	2.2	1.15	0.7	137
No MAFLD	7.09	0.02	28	24	35	78	3.4	1.88	1.2	108
No MAFLD	149.88	0.02	41	47	45	69	5.1	3.39	1.2	156
No MAFLD	364.4	0	25	29	20	60	3.7	1.25	2.2	69
No MAFLD	1368	10.42	53	33	55	74	3.5	1.4	2	242
No MAFLD	0.07	0	67	69	100	80	3.2	1.35	1.5	182
No MAFLD	4.75	0.39	23	21	21	66	3.8	2.15	1.1	128
No MAFLD	1648	0.12	37	32	29	102	4.2	1.93	1.9	101
No MAFLD	351.05	0.01	30	31	33	90	2.4	1.52	0.6	51
No MAFLD	9.47	0.04	32	23	55	70	5.5	3.76	1.3	212

## Sheet: 18 month
group	HBsAg(IU/mL)	HBeAg(C.O.I)	ALT,U/L	AST,U/L	GGT,U/L	ALP,U/L	WBC,×109/L	NC,×109/L	LC,×109/L	PLT,×109/L
MAFLD	29.11	0.02	16	20	27	67	8.5	8.5	1.9	238
MAFLD	8.96	0.16	36	38	86	76	3	1.68	1.7	198
MAFLD	142.82	0.03	20	13	35	94	6	6	2.4	313
MAFLD	0.02	0.32	46	37	82	50	4.6	4.6	1.4	107
MAFLD	540.52	0.22	21	19	26	64	6	6	2.2	189
MAFLD	25.97	0.084	31	25	44	67	2.7	2.7	0.9	151
MAFLD	0.05	0.02	26	32	96	70	4.3	4.3	1.1	161
MAFLD	0.58	0.03	21	18	25	43	5.3	5.3	1.3	206
MAFLD	56.19	0.01	27	25	14	56	5.3	3.4	1.8	300
MAFLD	303.16	0.04	26	19	17	110	5.5	5.5	1.5	215
MAFLD	1	0.01	46	33	50	66	3.3	3.3	1.1	104
MAFLD	1132	4.48	56	37	28	75	6.2	6.2	1.2	207
MAFLD	0	0.01	27	22	16	91	6.4	6.4	1.7	182
MAFLD	0.02	0.04	28	32	55	66	3.8	3.8	1.1	147
MAFLD	844.61	0.01	14	11	24	85	5.7	5.7	1.5	289
MAFLD	332.91	6.99	19	16	20	79	5.6	5.6	2.6	211
MAFLD	37.5	0	29	27	59	115	3.2	3.2	1.1	110
MAFLD	236.8	7.14	16	15	26	68	6.7	6.7	1.7	346
MAFLD	0.29	0.05	42	38	74	159	6	6	1.2	161
MAFLD	619.71	0.01	17	16	30	50	5.1	5.1	1.2	209
MAFLD	0	0.1	72	42	53	64	5.1	2.46	1.86	198
MAFLD	0.64	0	19	18	19	73	6.9	6.9	1.7	288
MAFLD	0.02	0.37	13	21	16	83	5.3	3.8	1.76	286
MAFLD	265.7	18.76	26	23	29	78	5.3	3.4	1.7	198
MAFLD	248.83	0	19	17	35	83	3	3	1.1	103
MAFLD	605.05	0.53	18	18	26	75	3.6	3	1.65	177
MAFLD	25.8	0	28	36	106	86	5.7	5.7	1.8	107
MAFLD	56.38	0.807	45	38	50	81	4.94	4.94	1.7	75
MAFLD	0	0.32	46	36	32	82	2.24	1.56	0.86	198
MAFLD	52.86	0	11	16	12	71	5.3	3.4	2.01	253
MAFLD	2.45	0	52	33	70	90	2.4	2.4	1.1	160
MAFLD	0	0	37	33	21	58	4.6	1.86	2.48	197
MAFLD	0	0	30	30	63	87	7	7	2.5	212
MAFLD	146.51	1	66	59	66	77	3.3	3.3	1	90
MAFLD	211.2	0	20	15	38	57	5.6	5.6	2	241
MAFLD	248.9	0.99	22	18	60	66	10.6	10.6	3.4	200
MAFLD	81.35	0.03	34	21	44	100	4.3	3.4	1.84	186
MAFLD	15.07	0	31	25	68	53	6.5	6.5	3.2	171
MAFLD	318.73	22.76	33	19	33	74	7	7	2.2	226
MAFLD	0.02	0	16	21	24	56	3.6	1.73	1.6	237
MAFLD	3.42	7.14	21	17	34	64	4.7	4.7	0.9	144
MAFLD	375.56	6.41	21	19	28	140	4.8	2.8	1.79	196
MAFLD	38.79	0	17	18	38	48	5.3	3.4	2	177
MAFLD	239.76	0.61	21	16	28	95	6.2	4.8	2.4	235
MAFLD	29.16	0.03	38	26	52	38	5.2	5.2	1.5	256
MAFLD	115.37	24.07	83	44	127	90	4.9	4.9	1.3	197
MAFLD	10.94	0.2	28	25	39	68	3.3	3.3	1.7	112
MAFLD	419.55	8.29	58	35	110	83	3.7	3.7	1.4	136
MAFLD	2436.78	0.22	39	24	93	69	6.1	6.1	2.5	280
MAFLD	1346.78	0	21	23	42	64	5.8	4.2	1	221
MAFLD	208.07	1.54	16	19	14	77	4.1	4.1	1.3	294
MAFLD	0	0.26	20	18	22	63	3.8	2.67	1.5	197
MAFLD	0.12	0	38	30	63	61	4.4	4.4	1.2	174
MAFLD	1888.74	59.32	11	17	18	60	5.3	5.3	2	299
MAFLD	1812.55	0.1	17	17	20	66	5	5	2.3	202
MAFLD	1038.07	9.18	13	18	14	112	5.9	5.9	1.8	412
MAFLD	2134.61	593.14	25	15	47	60	4.2	4.2	1.3	195
MAFLD	301.67	17.67	17	15	20	86	5.7	5.7	2.1	142
MAFLD	580.23	156.73	26	26	26	96	4	1.86	1.9	201
MAFLD	38.45	0.01	56	36	67	57	6.1	6.1	1.9	268
MAFLD	53.69	0.14	17	16	25	52	5.3	5.3	2	180
MAFLD	2332.59	1.06	14	15	27	57	5.6	5.6	1.6	231
MAFLD	13.25	0.06	24	24	29	73	7.2	7.2	2.6	256
MAFLD	502.51	6.82	27	22	94	82	3.4	3.4	0.8	95
MAFLD	0.12	0	81	96	95	91	3.1	3.1	1.4	162
MAFLD	405.64	0.12	57	33	238	76	8.1	8.1	4.2	238
MAFLD	2123	21.41	24	20	29	92	5.4	3.6	1.6	292
No MAFLD	255.45	0.01	20	18	20	53	4.6	2.72	1.6	186
No MAFLD	0	0.091	11	13	18	60	3.6	2.11	1.1	169
No MAFLD	365.2	0.09	123	71	21	159	4.2	1.81	1.72	72
No MAFLD	2893.75	56.63	26	24	34	45	5.7	4.5	0.9	246
No MAFLD	234.41	0	15	22	13	71	3.2	1.39	1.6	147
No MAFLD	0	0.02	36	36	42	75	3	1.77	0.7	123
No MAFLD	323.24	2	17	19	30	55	3.7	1.76	1.5	147
No MAFLD	34	0.03	86	41	46	78	3.4	1.46	1.46	92
No MAFLD	3678.02	32.35	126	27	362	172	4.4	2.44	1.4	250
No MAFLD	189.36	9.65	27	25	72	67	2.9	1.45	1.1	101
No MAFLD	3.95	0	15	20	27	55	6.1	3.4	2.2	200
No MAFLD	89.34	2.07	37	54	23	98	2.6	1.93	0.5	66
No MAFLD	7.59	0.077	39	30	24	61	4.1	2.7	1	229
No MAFLD	0	0.03	26	25	44	66	5.4	2.62	2.1	179
No MAFLD	469.84	0	18	22	15	72	2.2	1.32	0.6	85
No MAFLD	0	0	36	18	27	75	5.3	2.41	2.2	209
No MAFLD	193.6	0	10	15	12	74	5.8	3.57	1.7	255
No MAFLD	1355.48	0	19	31	13	60	3.2	1.59	1.5	181
No MAFLD	85.64	0	21	13	18	86	4.7	2.8	1.6	181
No MAFLD	51.35	0.47	20	24	19	81	4	2.33	1.2	139
No MAFLD	0.02	0.02	26	21	16	82	4	2.67	1.1	226
No MAFLD	0	0.86	25	24	41	60	3.1	1.78	1.1	62
No MAFLD	124.23	0	17	41	12	91	4.9	3.19	1.3	161
No MAFLD	0	0.73	14	17	35	75	4.9	1.8	1.68	213
No MAFLD	433.62	16.73	16	22	16	73	4.9	3.13	1.5	187
No MAFLD	185.37	0	28	35	55	82	2.7	1.01	1.4	139
No MAFLD	1256.7	50.32	24	28	17	58	4.6	2.3	1.83	176
No MAFLD	643.9	0.109	24	35	16	48	3.3	2.2	0.8	170
No MAFLD	437.68	318.9	20	16	18	62	6.6	4.62	1.5	245
No MAFLD	43.41	0.4	23	26	13	65	6.5	3.21	2.9	177
No MAFLD	5346.98	3.68	12	10	18	75	4.7	2.6	1.56	186
No MAFLD	170.6	0.112	18	21	36	117	4.8	2.86	1.5	173
No MAFLD	0	0.01	25	22	18	67	4.5	1.86	1.8	168
No MAFLD	0.02	0.02	13	16	18	61	3.9	2.05	1.4	184
No MAFLD	108.09	0.01	11	18	20	52	4.7	2.8	2	236
No MAFLD	46.55	0.03	41	27	41	77	6.4	3.36	2.6	150
No MAFLD	0	0.71	23	21	58	69	5.9	4.22	1.1	192
No MAFLD	291.25	1.47	63	50	92	91	4.1	2.43	1.3	113
No MAFLD	1068.08	0	16	25	12	57	4.1	2.06	1.3	141
No MAFLD	74.75	0.15	18	15	26	107	4.5	3.07	1.2	177
No MAFLD	333.11	0.02	27	20	19	62	5	3.01	1.5	238
No MAFLD	40.09	0.115	37	19	20	116	5	2.29	2.3	247
No MAFLD	0	0.03	21	17	29	77	5.3	2.83	2	231
No MAFLD	0	0	13	18	25	86	6.8	3.5	2.7	120
No MAFLD	0.05	0	12	17	12	70	6.6	3.6	2.1	148
No MAFLD	0	0	15	12	28	68	9.1	6.27	2.2	248
No MAFLD	0	0.08	26	27	41	75	3.8	2	1.9	187
No MAFLD	0	0.08	18	15	20	89	4.7	2.8	1.6	212
No MAFLD	0	0	14	20	13	64	4.3	1.79	1.8	165
No MAFLD	239.76	0.61	21	16	28	95	5.6	5.87	2.4	235
No MAFLD	7.1	1.52	52	73	336	84	5.5	2.62	2.4	124
No MAFLD	1.96	0.03	127	118	97	49	3.1	1.61	1.1	174
No MAFLD	0	0.01	12	20	10	72	5	2.8	1.8	235
No MAFLD	178.41	0.12	17	17	35	48	3.1	1.29	1.4	139
No MAFLD	0	1.73	10	13	10	60	4.2	2.28	1.5	128
No MAFLD	182.96	0	20	26	18	163	7.7	5.06	2.1	188
No MAFLD	0	0.03	30	26	22	65	4.9	2.8	1.9	121
No MAFLD	412.91	8.03	27	23	36	107	6.5	4.58	1.6	256
No MAFLD	386.7	2.78	19	17	42	64	4.8	3.26	1.4	179
No MAFLD	57.07	0.41	9	13	13	66	4.7	2.55	1.8	285
No MAFLD	245.43	0.66	11	19	19	56	2.8	1.43	1	132
No MAFLD	1.97	0.77	17	17	31	83	4.5	3.39	0.8	128
No MAFLD	0.83	5.03	26	19	35	88	7.3	3.89	2.6	240
No MAFLD	0	0	10	14	11	39	4.1	2.2	1.5	202
No MAFLD	12.56	0.03	16	16	48	72	4.7	3.15	1	161
No MAFLD	396.51	21.43	16	16	24	56	4.3	2	1.6	178
No MAFLD	1654.28	0	16	18	18	75	3.8	1.47	1.36	181
No MAFLD	138.52	0.01	17	18	19	66	4.6	2.44	1.8	194
No MAFLD	226.29	0	21	19	24	58	4.5	2.25	1.8	199
No MAFLD	34.52	0.94	11	14	15	73	3.8	2.98	0.6	153
No MAFLD	2.3	0.03	11	16	12	68	5.3	3.38	1.5	250
No MAFLD	0	0.02	19	19	27	59	5.3	3.45	1.3	246
No MAFLD	3.42	0.01	10	12	10	65	6.4	2.93	2.4	231
No MAFLD	356.87	21.08	28	28	25	80	3.2	0.89	1.2	132
No MAFLD	13.6	0	26	41	57	61	2.9	1.25	1.3	91
No MAFLD	719.9	0.01	85	58	45	74	6.6	3.12	2.9	291
No MAFLD	1.32	0	13	14	22	41	6.4	4.13	1.6	194
No MAFLD	0.03	0	9	21	14	58	3.4	1.35	0.9	58
No MAFLD	10.35	4.2	20	24	22	129	4.8	2.67	1.7	235
No MAFLD	1998.83	0.03	13	17	11	71	4.1	2.14	1.2	172
No MAFLD	46.32	0	18	15	21	58	3	0.93	0.9	78
No MAFLD	2149	0.102	16	18	17	96	4	3.07	0.8	203
No MAFLD	4.89	0	18	19	26	75	3.8	2.1	0.9	134
No MAFLD	309.55	0.01	11	14	15	51	6.1	4.2	1.6	223
No MAFLD	376.6	0.01	36	27	38	65	3.6	1.44	1.8	78
No MAFLD	1345.91	10.56	43	24	19	73	4.9	1.6	1.8	187
No MAFLD	0.01	0	52	50	78	74	3.4	1.34	1.5	210
No MAFLD	1.48	0.44	27	22	29	70	6.1	3.34	2.3	182
No MAFLD	871.32	0.02	19	21	14	82	4.1	1.62	1.5	141
No MAFLD	300.02	0	7	13	10	60	3.7	2.37	1.1	165
No MAFLD	24.86	0.11	46	10	56	76	5	3.03	1.7	203
